# Supplementary material
Source: PubMed Central journal article supplement (PMC6868459)

SUPPLEMENTARY DATA

**Supplementary Table S1. Age-adjusted characteristics of participants according to baseline 4-year changes in artificially sweetened beverage (ASB) consumption.**

|                                                 | Changes in ASB consumption* |                         |                                |                         |                 |
|-------------------------------------------------|-----------------------------|-------------------------|--------------------------------|-------------------------|-----------------|
|                                                 | Decrease                    |                         | No change or relatively stable | Increase                |                 |
|                                                 | >0.50 serving/d             | >0.07 to 0.50 serving/d | ±0.07 serving/d                | >0.07 to 0.50 serving/d | >0.50 serving/d |
| <b>NHS</b>                                      |                             |                         |                                |                         |                 |
| Participants, n                                 | 11,407                      | 10,234                  | 28,068                         | 12,237                  | 14,585          |
| Initial ASB intake, serving/d                   | 2.37 (1.84)                 | 0.63 (0.73)             | 0.30 (0.91)                    | 0.59 (0.99)             | 0.82 (1.14)     |
| Change in ASB intake, serving/d                 | -1.49 (1.01)                | -0.21 (0.12)            | 0.00 (0.00)                    | 0.20 (0.11)             | 1.48 (0.99)     |
| Age, y <sup>†</sup>                             | 58.0 (7.7)                  | 59.0 (7.9)              | 59.2 (8.0)                     | 57.6 (7.6)              | 55.8 (7.4)      |
| Initial BMI, kg/m <sup>2</sup>                  | 26.4 (5.0)                  | 25.5 (4.6)              | 24.5 (4.5)                     | 25.3 (4.5)              | 26.1 (4.8)      |
| Weight change, kg                               | 1.4 (6.2)                   | 1.2 (5.4)               | 1.1 (4.7)                      | 1.2 (5.0)               | 1.2 (5.8)       |
| Current smoker, %                               | 16.2                        | 14.5                    | 23.0                           | 15.2                    | 18.0            |
| Hypertension, %                                 | 35.3                        | 32.6                    | 28.7                           | 31.6                    | 34.1            |
| High cholesterol, %                             | 44.2                        | 41.8                    | 38.1                           | 41.3                    | 42.4            |
| Family history of diabetes, %                   | 28.5                        | 27.2                    | 26.3                           | 28.3                    | 28.6            |
| Fasting blood glucose screening, % <sup>‡</sup> | 58.4                        | 57.7                    | 53.8                           | 57.6                    | 58.3            |
| Initial physical activity, MET-h/w              | 15.5 (21.5)                 | 15.7 (20.9)             | 14.3 (21.4)                    | 14.4 (20.6)             | 14.6 (20.5)     |
| Change in physical activity, MET-h/w            | 1.5 (22.9)                  | 1.4 (22.3)              | 1.7 (22.0)                     | 2.0 (23.4)              | 2.5 (22.9)      |
| Initial total energy intake, kcal/d             | 1,757 (538)                 | 1,753 (526)             | 1,759 (529)                    | 1,757 (517)             | 1,758 (529)     |
| Change in total energy intake, kcal/d           | -39 (473)                   | -39 (445)               | -17 (454)                      | -3 (450)                | 14 (475)        |
| Initial AHEI score                              | 53.8 (10.9)                 | 53.9 (10.8)             | 51.5 (11.6)                    | 53.0 (10.9)             | 52.7 (11.1)     |
| Change in AHEI score                            | 0.4 (9.1)                   | 0.5 (8.6)               | 0.9 (8.5)                      | 1.0 (8.6)               | 1.2 (9.0)       |
| Initial sugary beverage intake, serving/d       | 0.67 (0.82)                 | 0.73 (0.81)             | 0.96 (1.11)                    | 0.73 (0.80)             | 0.81 (0.96)     |
| Change in sugary beverage intake, serving/d     | 0.11 (0.93)                 | 0.03 (0.79)             | 0.03 (0.93)                    | -0.02 (0.75)            | -0.15 (0.93)    |
| Initial SSB intake, serving/d                   | 0.25 (0.62)                 | 0.28 (0.63)             | 0.49 (0.96)                    | 0.26 (0.60)             | 0.36 (0.81)     |
| Change in SSB intake, serving/d                 | 0.12 (0.78)                 | 0.05 (0.64)             | 0.06 (0.79)                    | 0.01 (0.58)             | -0.11 (0.78)    |
| Initial fruit juice intake, serving/d           | 0.43 (0.47)                 | 0.45 (0.46)             | 0.48 (0.52)                    | 0.47 (0.47)             | 0.45 (0.47)     |
| Change in fruit juice intake, serving/d         | -0.01 (0.43)                | -0.02 (0.41)            | -0.02 (0.44)                   | -0.03 (0.41)            | -0.04 (0.43)    |
| <b>NHS II</b>                                   |                             |                         |                                |                         |                 |
| Participants, n                                 | 19,169                      | 11,515                  | 26,093                         | 9,298                   | 15,522          |
| Initial ASB intake, serving/d                   | 3.29 (2.56)                 | 1.09 (1.38)             | 0.47 (1.34)                    | 0.98 (1.41)             | 1.53 (1.76)     |
| Change in ASB intake, serving/d                 | -1.91 (1.43)                | -0.22 (0.12)            | 0.00 (0.00)                    | 0.22 (0.12)             | 1.86 (1.33)     |
| Age, y <sup>†</sup>                             | 41.0 (5.4)                  | 41.2 (5.3)              | 41.4 (5.5)                     | 41.2 (5.4)              | 40.7 (5.4)      |
| Initial BMI, kg/m <sup>2</sup>                  | 25.5 (5.6)                  | 24.5 (5.1)              | 23.7 (5.0)                     | 24.4 (4.9)              | 25.3 (5.5)      |
| Weight change, kg                               | 3.7 (7.2)                   | 3.1 (6.1)               | 2.6 (5.6)                      | 2.8 (6.0)               | 3.1 (7.1)       |
| Current smoker, %                               | 11.2                        | 9.0                     | 13.4                           | 9.2                     | 11.0            |
| Hypertension, %                                 | 10.9                        | 8.4                     | 7.3                            | 7.7                     | 9.7             |
| High cholesterol, %                             | 22.7                        | 19.3                    | 18.8                           | 19.7                    | 21.2            |
| Family history of diabetes, %                   | 36.4                        | 34.6                    | 32.2                           | 33.9                    | 36.4            |
| Fasting blood glucose screening, % <sup>‡</sup> | 48.4                        | 47.4                    | 45.0                           | 47.6                    | 47.2            |

SUPPLEMENTARY DATA

|                                                 |              |              |              |              |              |
|-------------------------------------------------|--------------|--------------|--------------|--------------|--------------|
| Initial physical activity, MET-h/w              | 26.0 (37.2)  | 23.7 (33.6)  | 22.4 (33.8)  | 23.8 (33.3)  | 23.9 (33.9)  |
| Change in physical activity, MET-h/w            | -3.8 (35.0)  | -2.5 (32.8)  | -2.6 (30.9)  | -3.0 (32.2)  | -3.0 (32.5)  |
| Initial total energy intake, kcal/d             | 1,780 (551)  | 1,764 (531)  | 1,827 (555)  | 1,756 (532)  | 1,764 (544)  |
| Change in total energy intake, kcal/d           | 7 (517)      | 13 (480)     | 16 (495)     | 45 (477)     | 49 (507)     |
| Initial AHEI score                              | 50.3 (10.8)  | 50.4 (10.9)  | 47.5 (11.6)  | 49.9 (10.7)  | 49.1 (11.0)  |
| Change in AHEI score                            | 0.4 (9.6)    | 0.8 (9.0)    | 1.4 (8.6)    | 1.0 (8.9)    | 0.9 (9.5)    |
| Initial sugary beverage intake, serving/d       | 0.77 (1.05)  | 0.92 (1.14)  | 1.55 (1.69)  | 0.94 (1.17)  | 0.99 (1.32)  |
| Change in sugary beverage intake, serving/d     | 0.17 (1.16)  | -0.01 (1.00) | -0.09 (1.30) | -0.10 (0.98) | -0.28 (1.20) |
| Initial SSB intake, serving/d                   | 0.41 (0.89)  | 0.51 (0.98)  | 1.08 (1.56)  | 0.52 (1.01)  | 0.62 (1.19)  |
| Change in SSB intake, serving/d                 | 0.16 (1.03)  | 0.00 (0.86)  | -0.07 (1.16) | -0.07 (0.84) | -0.24 (1.08) |
| Initial fruit juice intake, serving/d           | 0.36 (0.44)  | 0.41 (0.46)  | 0.47 (0.56)  | 0.42 (0.48)  | 0.37 (0.45)  |
| Change in fruit juice intake, serving/d         | 0.01 (0.42)  | -0.01 (0.42) | -0.02 (0.47) | -0.03 (0.42) | -0.03 (0.40) |
| <b>HPFS</b>                                     |              |              |              |              |              |
| Participants, n                                 | 4,522        | 5,014        | 13,945       | 5,234        | 5,509        |
| Initial ASB intake, serving/d                   | 2.54 (2.08)  | 0.70 (0.92)  | 0.17 (0.69)  | 0.45 (0.82)  | 0.84 (1.18)  |
| Change in ASB intake, serving/d                 | -1.48 (1.02) | -0.21 (0.11) | 0.00 (0.00)  | 0.22 (0.12)  | 1.45 (0.98)  |
| Age, y <sup>†</sup>                             | 56.4 (9.2)   | 58.0 (9.7)   | 58.3 (9.8)   | 58.0 (9.7)   | 55.5 (9.2)   |
| Initial BMI, kg/m <sup>2</sup>                  | 26.3 (3.3)   | 25.5 (3.2)   | 24.8 (2.9)   | 25.3 (2.9)   | 26.2 (3.4)   |
| Weight change, kg                               | 0.9 (4.8)    | 0.7 (4.1)    | 0.6 (3.6)    | 0.6 (4.0)    | 0.6 (4.9)    |
| Current smoker, %                               | 6.9          | 6.8          | 10.3         | 7.2          | 7.4          |
| Hypertension, %                                 | 27.7         | 23.4         | 20.2         | 23.3         | 27.8         |
| High cholesterol, %                             | 33.5         | 30.6         | 25.6         | 30.8         | 30.6         |
| Family history of diabetes, %                   | 27.9         | 26.2         | 24.2         | 26.4         | 27.4         |
| Fasting blood glucose screening, % <sup>‡</sup> | 74.0         | 72.9         | 69.9         | 73.0         | 73.5         |
| Initial physical activity, MET-h/w              | 21.7 (30.2)  | 20.8 (27.1)  | 18.8 (24.4)  | 19.7 (22.6)  | 20.6 (30.7)  |
| Change in physical activity, MET-h/w            | 1.0 (28.5)   | 2.0 (25.7)   | 1.6 (22.9)   | 2.5 (21.8)   | 2.1 (29.0)   |
| Initial total energy intake, kcal/d             | 1,985 (632)  | 1,991 (613)  | 2,046 (635)  | 1,964 (608)  | 1,968 (603)  |
| Change in total energy intake, kcal/d           | -105 (543)   | -93 (493)    | -77 (520)    | -40 (497)    | -29 (538)    |
| Initial AHEI score                              | 54.2 (10.9)  | 54.4 (11.1)  | 51.7 (12.0)  | 54.2 (11.2)  | 53.4 (11.5)  |
| Change in AHEI score                            | 1.0 (9.3)    | 0.9 (8.9)    | 1.1 (8.6)    | 1.0 (8.7)    | 1.1 (9.1)    |
| Initial sugary beverage intake, serving/d       | 0.85 (0.92)  | 0.94 (0.95)  | 1.16 (1.21)  | 0.92 (0.90)  | 1.03 (1.10)  |
| Change in sugary beverage intake, serving/d     | 0.04 (0.96)  | -0.02 (0.83) | -0.03 (0.95) | -0.05 (0.79) | -0.21 (1.02) |
| Initial SSB intake, serving/d                   | 0.38 (0.70)  | 0.44 (0.75)  | 0.66 (1.06)  | 0.43 (0.72)  | 0.55 (0.94)  |
| Change in SSB intake, serving/d                 | 0.06 (0.79)  | -0.01 (0.66) | -0.02 (0.79) | -0.03 (0.61) | -0.20 (0.86) |
| Initial fruit juice intake, serving/d           | 0.47 (0.54)  | 0.50 (0.50)  | 0.50 (0.55)  | 0.50 (0.50)  | 0.48 (0.51)  |
| Change in fruit juice intake, serving/d         | -0.01 (0.47) | -0.01 (0.44) | -0.01 (0.46) | -0.01 (0.44) | -0.01 (0.47) |

\* One beverage serving is 8 oz. Values are means (SD) or percentages and are standardized to the age distribution of the study population.

<sup>†</sup> Value is not age adjusted.

<sup>‡</sup> Values refer to the first assessment of fasting blood glucose examination (1998 for the NHS, 2001 for the NHS II, and 2000 for the HPFS).

SUPPLEMENTARY DATA

**Supplementary Table S2. HRs (95% CIs) for incident type 2 diabetes according to categories of updated 4-year changes in beverage consumption.**

|                                  | Changes in beverage consumption* |                         |                                |                         |                   | P values for trend |
|----------------------------------|----------------------------------|-------------------------|--------------------------------|-------------------------|-------------------|--------------------|
|                                  | Decrease                         |                         | No change or relatively stable | Increase                |                   |                    |
|                                  | >0.50 serving/d                  | >0.07 to 0.50 serving/d | ±0.07 serving/d                | >0.07 to 0.50 serving/d | >0.50 serving/d   |                    |
| <b>Total Sugary Beverages</b>    |                                  |                         |                                |                         |                   |                    |
| <b>NHS</b>                       |                                  |                         |                                |                         |                   |                    |
| Median change                    | -0.90                            | -0.23                   | 0.00                           | +0.23                   | +0.91             |                    |
| Cases/person-years               | 1,198/208,337                    | 1,326/274,618           | 1,180/260,027                  | 1,188/246,676           | 1,101/189,184     |                    |
| Model 1                          | 1.06 (0.93, 1.21)                | 0.95 (0.90, 1.01)       | 1.00                           | 1.11 (0.99, 1.24)       | 1.40 (1.17, 1.68) | 0.45               |
| Model 2                          | 0.96 (0.84, 1.10)                | 0.98 (0.93, 1.04)       | 1.00                           | 1.06 (0.95, 1.19)       | 1.18 (0.98, 1.44) | 0.003              |
| <b>NHS II</b>                    |                                  |                         |                                |                         |                   |                    |
| Median change                    | -1.03                            | -0.21                   | 0.00                           | +0.21                   | +1.04             |                    |
| Cases/person-years               | 845/238,311                      | 795/262,483             | 704/232,058                    | 638/198,012             | 631/168,725       |                    |
| Model 1                          | 1.17 (0.99, 1.38)                | 0.97 (0.90, 1.04)       | 1.00                           | 1.23 (1.06, 1.42)       | 1.65 (1.30, 2.09) | 0.01               |
| Model 2                          | 1.00 (0.83, 1.19)                | 1.02 (0.95, 1.11)       | 1.00                           | 1.09 (0.94, 1.27)       | 1.10 (0.84, 1.42) | <0.0001            |
| <b>HPFS</b>                      |                                  |                         |                                |                         |                   |                    |
| Median change                    | -0.94                            | -0.23                   | 0.00                           | +0.23                   | +0.92             |                    |
| Cases/person-years               | 462/97,140                       | 546/116,143             | 381/89,350                     | 478/112,010             | 433/90,139        |                    |
| Model 1                          | 0.93 (0.76, 1.15)                | 0.93 (0.85, 1.02)       | 1.00                           | 1.04 (0.87, 1.25)       | 1.32 (0.98, 1.79) | 0.45               |
| Model 2                          | 0.89 (0.72, 1.10)                | 0.95 (0.86, 1.04)       | 1.00                           | 1.03 (0.86, 1.24)       | 1.21 (0.89, 1.65) | 0.70               |
| <b>Pooled</b>                    |                                  |                         |                                |                         |                   |                    |
| Model 1                          | 1.07 (0.97, 1.17)                | 0.95 (0.91, 0.99)       | 1.00                           | 1.13 (1.04, 1.22)       | 1.46 (1.28, 1.66) | 0.09               |
| Model 2                          | 0.96 (0.87, 1.05)                | 0.99 (0.95, 1.03)       | 1.00                           | 1.06 (0.98, 1.16)       | 1.16 (1.01, 1.34) | <0.0001            |
| <b>Sugar sweetened beverages</b> |                                  |                         |                                |                         |                   |                    |
| <b>NHS</b>                       |                                  |                         |                                |                         |                   |                    |
| Median change                    | -0.87                            | -0.11                   | 0.00                           | +0.11                   | +0.87             |                    |
| Cases/person-years               | 830/134,354                      | 1,134/220,560           | 2,237/491,601                  | 999/202,147             | 793/130,179       |                    |
| Model 1                          | 1.28 (1.18, 1.38)                | 1.09 (1.01, 1.17)       | 1.00                           | 1.08 (1.00, 1.16)       | 1.29 (1.19, 1.40) | 1.00               |
| Model 2                          | 1.02 (0.92, 1.14)                | 1.03 (0.94, 1.13)       | 1.00                           | 1.04 (0.96, 1.12)       | 1.10 (1.00, 1.20) | 0.12               |
| <b>NHS II</b>                    |                                  |                         |                                |                         |                   |                    |
| Median change                    | -1.08                            | -0.11                   | 0.00                           | +0.11                   | +1.08             |                    |
| Cases/person-years               | 677/177,535                      | 689/227,819             | 1,182/381,185                  | 523/175,561             | 542/137,488       |                    |
| Model 1                          | 1.36 (1.24, 1.50)                | 1.03 (0.94, 1.13)       | 1.00                           | 1.11 (1.00, 1.24)       | 1.59 (1.43, 1.76) | 0.15               |
| Model 2                          | 0.92 (0.81, 1.06)                | 0.99 (0.87, 1.11)       | 1.00                           | 1.04 (0.93, 1.16)       | 1.13 (1.00, 1.27) | 0.001              |
| <b>HPFS</b>                      |                                  |                         |                                |                         |                   |                    |
| Median change                    | -0.87                            | -0.21                   | 0.00                           | +0.12                   | +0.87             |                    |
| Cases/person-years               | 356/67,827                       | 468/108,276             | 771/170,304                    | 432/98,913              | 273/59,461        |                    |

SUPPLEMENTARY DATA

|                                         |                   |                   |               |                   |                                |                    |
|-----------------------------------------|-------------------|-------------------|---------------|-------------------|--------------------------------|--------------------|
| Model 1                                 | 1.22 (1.07, 1.38) | 0.99 (0.88, 1.11) | 1.00          | 0.98 (0.87, 1.11) | 1.06 (0.92, 1.22)              | 0.06               |
| Model 2                                 | 1.15 (0.97, 1.37) | 1.03 (0.90, 1.19) | 1.00          | 0.99 (0.88, 1.12) | 1.03 (0.89, 1.20)              | 0.29               |
| <b>Pooled</b>                           |                   |                   |               |                   |                                |                    |
| Model 1                                 | 1.29 (1.22, 1.37) | 1.05 (1.00, 1.10) | 1.00          | 1.07 (1.01, 1.12) | 1.33 (1.25, 1.41) <sup>†</sup> | 0.86               |
| Model 2                                 | 1.01 (0.94, 1.09) | 1.02 (0.95, 1.09) | 1.00          | 1.03 (0.97, 1.09) | 1.09 (1.03, 1.17)              | 0.006 <sup>†</sup> |
| <b>100% Fruit juices</b>                |                   |                   |               |                   |                                |                    |
| <b>NHS</b>                              |                   |                   |               |                   |                                |                    |
| Median change                           | -0.68             | -0.23             | 0.00          | +0.23             | +0.67                          |                    |
| Cases/person-years                      | 606/107,652       | 1,507/294,154     | 1,987/423,210 | 1,342/258,246     | 551/95,579                     |                    |
| Model 1                                 | 1.14 (1.04, 1.24) | 1.07 (1.00, 1.15) | 1.00          | 1.10 (1.03, 1.18) | 1.19 (1.08, 1.30)              | 0.45               |
| Model 2                                 | 1.07 (0.96, 1.18) | 1.02 (0.94, 1.09) | 1.00          | 1.07 (0.99, 1.15) | 1.17 (1.06, 1.28)              | 0.04               |
| <b>NHS II</b>                           |                   |                   |               |                   |                                |                    |
| Median change                           | -0.71             | -0.18             | 0.00          | +0.18             | +0.71                          |                    |
| Cases/person-years                      | 285/93,654        | 943/302,122       | 1,399/418,128 | 790/222,223       | 196/63,462                     |                    |
| Model 1                                 | 0.98 (0.86, 1.11) | 0.98 (0.91, 1.07) | 1.00          | 1.17 (1.07, 1.27) | 1.08 (0.93, 1.25)              | 0.02               |
| Model 2                                 | 1.00 (0.86, 1.18) | 0.97 (0.88, 1.07) | 1.00          | 1.14 (1.04, 1.25) | 1.07 (0.92, 1.25)              | 0.06               |
| <b>HPFS</b>                             |                   |                   |               |                   |                                |                    |
| Median change                           | -0.73             | -0.22             | 0.00          | +0.23             | +0.72                          |                    |
| Cases/person-years                      | 197/45,893        | 606/124,733       | 695/162,549   | 561/124,999       | 241/46,607                     |                    |
| Model 1                                 | 1.00 (0.85, 1.17) | 1.15 (1.03, 1.28) | 1.00          | 1.04 (0.93, 1.16) | 1.17 (1.01, 1.35)              | 0.48               |
| Model 2                                 | 1.02 (0.85, 1.23) | 1.15 (1.02, 1.29) | 1.00          | 1.06 (0.95, 1.19) | 1.18 (1.02, 1.37)              | 0.35               |
| <b>Pooled</b>                           |                   |                   |               |                   |                                |                    |
| Model 1                                 | 1.06 (1.00, 1.14) | 1.06 (1.01, 1.11) | 1.00          | 1.11 (1.05, 1.16) | 1.16 (1.08, 1.24)              | 0.04               |
| Model 2                                 | 1.04 (0.96, 1.13) | 1.03 (0.97, 1.08) | 1.00          | 1.09 (1.03, 1.14) | 1.15 (1.07, 1.23)              | 0.004              |
| <b>Artificially sweetened beverages</b> |                   |                   |               |                   |                                |                    |
| <b>NHS</b>                              |                   |                   |               |                   |                                |                    |
| Median change                           | -1.08             | -0.21             | 0.00          | +0.21             | +1.08                          |                    |
| Cases/person-years                      | 1,222/194,664     | 948/187,510       | 2,212/502,117 | 717/147,295       | 894/147,255                    |                    |
| Model 1                                 | 1.21 (1.05, 1.40) | 0.95 (0.90, 1.01) | 1.00          | 1.20 (1.08, 1.34) | 1.68 (1.41, 2.01)              | 0.91               |
| Model 2                                 | 1.10 (0.94, 1.28) | 1.04 (0.98, 1.11) | 1.00          | 0.97 (0.86, 1.09) | 1.02 (0.83, 1.25)              | 0.007              |
| <b>NHS II</b>                           |                   |                   |               |                   |                                |                    |
| Median change                           | -1.29             | -0.21             | 0.00          | +0.21             | +1.40                          |                    |
| Cases/person-years                      | 979/240,097       | 457/156,402       | 1,078/394,620 | 355/121,863       | 744/186,606                    |                    |
| Model 1                                 | 1.27 (1.05, 1.54) | 0.92 (0.85, 0.99) | 1.00          | 1.19 (1.02, 1.38) | 1.96 (1.56, 2.46)              | 0.21               |
| Model 2                                 | 1.05 (0.86, 1.28) | 0.96 (0.88, 1.04) | 1.00          | 1.11 (0.94, 1.30) | 1.35 (1.04, 1.76)              | 0.48               |
| <b>HPFS</b>                             |                   |                   |               |                   |                                |                    |
| Median change                           | -1.08             | -0.21             | 0.00          | +0.21             | +1.08                          |                    |
| Cases/person-years                      | 410/71,648        | 350/78,793        | 846/221,946   | 307/67,712        | 387/64,683                     |                    |
| Model 1                                 | 1.11 (0.88, 1.41) | 0.88 (0.81, 0.97) | 1.00          | 1.35 (1.14, 1.61) | 2.29 (1.72, 3.04)              | 0.29               |
| Model 2                                 | 0.93 (0.72, 1.21) | 0.96 (0.86, 1.07) | 1.00          | 1.11 (0.92, 1.34) | 1.38 (0.98, 1.93)              | 0.008              |
| <b>Pooled</b>                           |                   |                   |               |                   |                                |                    |
| Model 1                                 | 1.21 (1.09, 1.34) | 0.93 (0.89, 0.97) | 1.00          | 1.23 (1.13, 1.33) | 1.87 (1.65, 2.12)              | 0.60               |

SUPPLEMENTARY DATA

|         |                   |                   |      |                   |                   |       |
|---------|-------------------|-------------------|------|-------------------|-------------------|-------|
| Model 2 | 1.05 (0.94, 1.17) | 1.00 (0.95, 1.04) | 1.00 | 1.03 (0.95, 1.13) | 1.18 (1.02, 1.36) | 0.001 |
|---------|-------------------|-------------------|------|-------------------|-------------------|-------|

\* One beverage serving is 8 oz. Results of the 3 cohorts were pooled using an inverse variance–weighted, fixed-effect meta-analysis. Models were adjusted as follow. **Model 1:** adjusted for age, and stratified by calendar year in 4-y intervals. **Model 2:** Model 1 + race (white, non-white), family history of diabetes (yes/no), physical examination during the 4-year cycle (yes/no), menopausal status and postmenopausal hormone use (premenopausal, postmenopausal + current use, postmenopausal + past use, postmenopausal + never use, missing indicator) and oral contraceptive use (never, current, past, missing indicator), smoking status (never to never, never to current, past to past, past to current, current to past, current to current, missing indicator), initial and change in physical activity level (MET-h/w, quintiles), initial and change in alcohol consumption (g/d, quintiles), initial BMI (<21.0, 21.0-24.9, 25.0-29.9, 30.0-31.9,  $\geq 32.0$  kg/m<sup>2</sup>), initial calorie intake (quintiles), initial and change in AHEI score (calculated without the alcohol and sugary beverage components, quintiles), initial and change in intakes of water, coffee, tea, and milk (serving/d, quintiles or tertiles), initial intakes of sugary beverages, or SSBs and fruit juices, and ASBs (serving/d; depending on the model, quintiles or tertiles), changes in ASBs, fruit juices, SSBs, or sugary beverages (serving/d; depending on the model, quintiles).

† *P*-heterogeneity < 0.05.

SUPPLEMENTARY DATA

**Supplementary Table S3. Sensitivity analyses of changes in beverage consumption and incident type 2 diabetes.**

|                                                              | Changes in beverage consumption* |                         |                                |                         |                     | P values for trend |
|--------------------------------------------------------------|----------------------------------|-------------------------|--------------------------------|-------------------------|---------------------|--------------------|
|                                                              | Decrease                         |                         | No change or relatively stable | Increase                |                     |                    |
|                                                              | >0.50 serving/d                  | >0.07 to 0.50 serving/d | ±0.07 serving/d                | >0.07 to 0.50 serving/d | >0.50 serving/d     |                    |
| <b>Total Sugary Beverages</b>                                |                                  |                         |                                |                         |                     |                    |
| Model 2 + change in calorie intake                           | 0.95 (0.86, 1.05)                | 0.98 (0.94, 1.02)       | 1.00                           | 1.07 (0.99, 1.16)       | 1.16 (1.01, 1.34)   | 0.006              |
| Model 2 + change in body weight                              | 0.95 (0.87, 1.05)                | 0.98 (0.94, 1.03)       | 1.00                           | 1.06 (0.97, 1.15)       | 1.16 (1.01, 1.33)   | 0.0003             |
| Model 2 + change in calorie intake and change in body weight | 0.95 (0.86, 1.04)                | 0.97 (0.93, 1.02)       | 1.00                           | 1.06 (0.98, 1.15)       | 1.16 (1.01, 1.33)   | 0.04               |
| 4-year lag <sup>†</sup>                                      | 1.02 (0.94, 1.10)                | 1.03 (0.96, 1.10)       | 1.00                           | 1.06 (0.99, 1.13)       | 1.14 (1.06, 1.22)   | 0.0001             |
| 8-year change <sup>‡</sup>                                   | 1.00 (0.92, 1.08)                | 0.98 (0.91, 1.05)       | 1.00                           | 0.99 (0.93, 1.07)**     | 1.14 (1.06, 1.22)   | <0.0001            |
| Symptomatic diabetes <sup>§</sup>                            | 0.95 (0.82, 1.10)                | 0.98 (0.92, 1.04)       | 1.00                           | 1.12 (0.99, 1.27)       | 1.27 (1.03, 1.57)   | <0.0001            |
| <b>Sugar sweetened beverages</b>                             |                                  |                         |                                |                         |                     |                    |
| Model 2 + change in calorie intake                           | 1.03 (0.95, 1.11)                | 1.02 (0.96, 1.09)       | 1.00                           | 1.02 (0.96, 1.08)       | 1.06 (1.00, 1.14)   | 0.15**             |
| Model 2 + change in body weight                              | 1.02 (0.95, 1.10)                | 1.02 (0.96, 1.09)       | 1.00                           | 1.02 (0.96, 1.07)       | 1.08 (1.01, 1.15)   | 0.06               |
| Model 2 + change in calorie intake and change in body weight | 1.04 (0.96, 1.12)                | 1.03 (0.97, 1.10)       | 1.00                           | 1.01 (0.95, 1.07)       | 1.05 (0.98, 1.12)   | 0.41               |
| 4-year lag <sup>†</sup>                                      | 1.02 (0.94, 1.11)                | 1.06 (0.99, 1.14)**     | 1.00                           | 1.06 (1.00, 1.13)**     | 1.12 (1.05, 1.20)** | 0.002**            |
| 8-year change <sup>‡</sup>                                   | 1.05 (0.97, 1.14)                | 1.04 (0.97, 1.12)       | 1.00                           | 1.05 (0.98, 1.12)       | 1.15 (1.07, 1.23)   | 0.002              |
| Symptomatic diabetes <sup>§</sup>                            | 1.11 (0.99, 1.25)                | 1.10 (0.99, 1.21)       | 1.00                           | 1.13 (1.04, 1.24)       | 1.25 (1.14, 1.38)   | 0.002              |
| <b>100% Fruit juices</b>                                     |                                  |                         |                                |                         |                     |                    |
| Model 2 + change in calorie intake                           | 1.06 (0.97, 1.14)                | 1.03 (0.98, 1.09)       | 1.00                           | 1.08 (1.02, 1.13)       | 1.12 (1.04, 1.20)   | 0.06               |
| Model 2 + change in body weight                              | 1.05 (0.97, 1.13)                | 1.03 (0.98, 1.09)       | 1.00                           | 1.08 (1.03, 1.13)       | 1.14 (1.06, 1.22)   | 0.01               |
| Model 2 + change in calorie intake and change in body weight | 1.06 (0.98, 1.15)                | 1.04 (0.98, 1.09)       | 1.00                           | 1.07 (1.02, 1.12)       | 1.11 (1.04, 1.20)   | 0.11               |
| 4-year lag <sup>†</sup>                                      | 1.07 (0.98, 1.17)                | 1.03 (0.97, 1.09)       | 1.00                           | 1.05 (0.99, 1.11)       | 1.14 (1.05, 1.23)   | 0.09               |
| 8-year change <sup>‡</sup>                                   | 1.02 (0.93, 1.11)                | 1.02 (0.96, 1.08)       | 1.00                           | 1.06 (1.00, 1.12)**     | 1.09 (1.01, 1.18)   | 0.04               |
| Symptomatic diabetes <sup>§</sup>                            | 1.10 (0.98, 1.24)                | 1.14 (1.05, 1.24)       | 1.00                           | 1.20 (1.11, 1.30)       | 1.24 (1.11, 1.38)   | 0.01               |
| <b>Artificially sweetened</b>                                |                                  |                         |                                |                         |                     |                    |

SUPPLEMENTARY DATA

| <b>beverages</b>                                             |                   |                   |      |                   |                   |           |
|--------------------------------------------------------------|-------------------|-------------------|------|-------------------|-------------------|-----------|
| Model 2 + change in calorie intake                           | 1.05 (0.94, 1.17) | 1.00 (0.95, 1.04) | 1.00 | 1.03 (0.95, 1.13) | 1.18 (1.02, 1.36) | 0.003     |
| Model 2 + change in body weight                              | 1.05 (0.94, 1.17) | 1.00 (0.95, 1.04) | 1.00 | 1.04 (0.95, 1.13) | 1.18 (1.02, 1.37) | 0.002     |
| Model 2 + change in calorie intake and change in body weight | 1.05 (0.94, 1.17) | 0.99 (0.95, 1.04) | 1.00 | 1.04 (0.95, 1.13) | 1.18 (1.02, 1.37) | 0.006     |
| 4-year lag <sup>†</sup>                                      | 1.02 (0.95, 1.10) | 1.05 (0.97, 1.13) | 1.00 | 1.05 (0.97, 1.13) | 1.20 (1.12, 1.28) | <0.0001   |
| 8-year change <sup>‡</sup>                                   | 1.00 (0.93, 1.08) | 1.01 (0.93, 1.10) | 1.00 | 1.12 (1.04, 1.20) | 1.19 (1.11, 1.27) | <0.0001** |
| Symptomatic diabetes <sup>§</sup>                            | 1.11 (0.94, 1.31) | 1.01 (0.95, 1.08) | 1.00 | 0.98 (0.86, 1.12) | 1.17 (0.94, 1.47) | 0.03      |

\* All analyses are based on model 2 as defined in Table 2.

<sup>†</sup> We added a 4-year lag after changes in beverage consumption to estimate the 4-year risk of type 2 diabetes. For instance, changes in beverage consumption from 1986 to 1990 were used to evaluate the risk of type 2 diabetes between 1994 and 1998, and so forth. This analysis included 9,760 incident cases of type 2 diabetes reported during 2,081,528 person-years.

<sup>‡</sup> We used changes in beverage consumption updated every 8 years as a time-varying exposure to estimate the risk of type 2 diabetes in the subsequent 8-year period. For instance, changes in beverage consumption from 1986 to 1994 were used to evaluate the risk of type 2 diabetes between 1994 and 2002. This analysis included 9,443 incident cases of type 2 diabetes reported during 1,955,878 person-years.

<sup>§</sup> This analysis included 5,170 incident cases of symptomatic diabetes reported during 2,795,610 person-years.

\*\* *P*-heterogeneity < 0.05.

SUPPLEMENTARY DATA

**Supplementary Table S4. Stratified analysis of risk of incident type 2 diabetes according to change in sugary beverage and artificially sweetened beverage consumption in NHS, NHS II and HPFS (pooled results).**

|                                              | Cases/person-years, n | Changes in consumption frequency* |                         |                                |                         |                   | P values for trend | P values for interaction† |
|----------------------------------------------|-----------------------|-----------------------------------|-------------------------|--------------------------------|-------------------------|-------------------|--------------------|---------------------------|
|                                              |                       | Decrease                          |                         | No change or relatively stable | Increase                |                   |                    |                           |
|                                              |                       | >0.50 serving/d                   | >0.07 to 0.50 serving/d | ±0.07 serving/d                | >0.07 to 0.50 serving/d | >0.50 serving/d   |                    |                           |
| <b>Total Sugary Beverages</b>                |                       |                                   |                         |                                |                         |                   |                    |                           |
| <b>Initial AHEI index</b>                    |                       |                                   |                         |                                |                         |                   |                    |                           |
| AHEI < median                                | 6,914/1,445,544       | 0.97 (0.86, 1.10)                 | 0.98 (0.93, 1.03)       | 1.00                           | 1.06 (0.95, 1.18)       | 1.25 (1.04, 1.50) | 0.0003             | 0.07                      |
| AHEI ≥ median                                | 4,992/1,337,666       | 0.95 (0.82, 1.10)                 | 1.01 (0.94, 1.08)       | 1.00                           | 1.07 (0.95, 1.22)       | 1.05 (0.84, 1.30) | 0.003              |                           |
| <b>Obesity</b>                               |                       |                                   |                         |                                |                         |                   |                    |                           |
| BMI < 30.0 kg/m <sup>2</sup>                 | 6,220/2,371,832       | 1.00 (0.88, 1.14)                 | 1.00 (0.94, 1.06)       | 1.00                           | 1.06 (0.94, 1.18)       | 1.12 (0.92, 1.35) | 0.009              | 0.34                      |
| BMI ≥ 30.0 kg/m <sup>2</sup>                 | 5,686/ 411,379        | 0.92 (0.80, 1.06)                 | 0.98 (0.92, 1.04)       | 1.00                           | 1.07 (0.95, 1.21)       | 1.22 (1.00, 1.50) | <0.0001            |                           |
| <b>4-y change in physical activity level</b> |                       |                                   |                         |                                |                         |                   |                    |                           |
| Decrease or no change                        | 8,935/1,934,992       | 0.96 (0.86, 1.07)                 | 1.00 (0.95, 1.05)       | 1.00                           | 1.05 (0.96, 1.16)       | 1.12 (0.96, 1.32) | <0.0001            | 0.94                      |
| Increase ≥ 5 MET-h/w                         | 2,971/ 848,219        | 0.95 (0.79, 1.15)                 | 0.96 (0.88, 1.04)       | 1.00                           | 1.13 (0.96, 1.33)       | 1.38 (1.04, 1.82) | 0.01               |                           |
| <b>ASBs</b>                                  |                       |                                   |                         |                                |                         |                   |                    |                           |
| <b>Initial AHEI index</b>                    |                       |                                   |                         |                                |                         |                   |                    |                           |
| AHEI < median                                | 6,914/1,445,544       | 1.03 (0.89, 1.20)                 | 0.98 (0.92, 1.04)       | 1.00                           | 1.06 (0.94, 1.18)       | 1.23 (1.01, 1.49) | 0.10               | 0.72                      |
| AHEI ≥ median                                | 4,992/1,337,666       | 1.06 (0.90, 1.25)                 | 1.02 (0.95, 1.09)       | 1.00                           | 1.01 (0.89, 1.15)       | 1.13 (0.90, 1.41) | 0.003              |                           |
| <b>Obesity</b>                               |                       |                                   |                         |                                |                         |                   |                    |                           |
| BMI < 30.0 kg/m <sup>2</sup>                 | 6,220/2,371,832       | 1.01 (0.87, 1.18)                 | 0.98 (0.92, 1.04)       | 1.00                           | 1.05 (0.93, 1.18)       | 1.33 (1.08, 1.63) | 0.0002             | 0.35                      |
| BMI ≥ 30.0 kg/m <sup>2</sup>                 | 5,686/ 411,379        | 1.07 (0.91, 1.25)                 | 1.01 (0.95, 1.07)       | 1.00                           | 1.03 (0.91, 1.16)       | 1.06 (0.86, 1.31) | 0.37               |                           |
| <b>4-y change in physical activity level</b> |                       |                                   |                         |                                |                         |                   |                    |                           |
| Decrease or no change                        | 8,935/1,934,992       | 1.04 (0.91, 1.18)                 | 0.99 (0.94, 1.04)       | 1.00                           | 1.05 (0.95, 1.16)       | 1.19 (1.01, 1.41) | 0.006              | 0.94                      |



SUPPLEMENTARY DATA

|                           |                |                   |                   |      |                   |                   |      |
|---------------------------|----------------|-------------------|-------------------|------|-------------------|-------------------|------|
| Increase $\geq$ 5 MET-h/w | 2,971/ 848,219 | 1.06 (0.85, 1.32) | 0.99 (0.91, 1.09) | 1.00 | 1.02 (0.86, 1.20) | 1.21 (0.90, 1.62) | 0.10 |
|---------------------------|----------------|-------------------|-------------------|------|-------------------|-------------------|------|

---

\* All analyses are based on model 2 as defined in Table 2.

† *P*-values for interaction were calculated using the likelihood ratio test.

SUPPLEMENTARY DATA

**Supplementary Figure S1. Flow-chart of participants.**

FFQ: food frequency questionnaire; HPFS: Health Professionals' Follow-up Study; NHS: Nurses' Health Study.

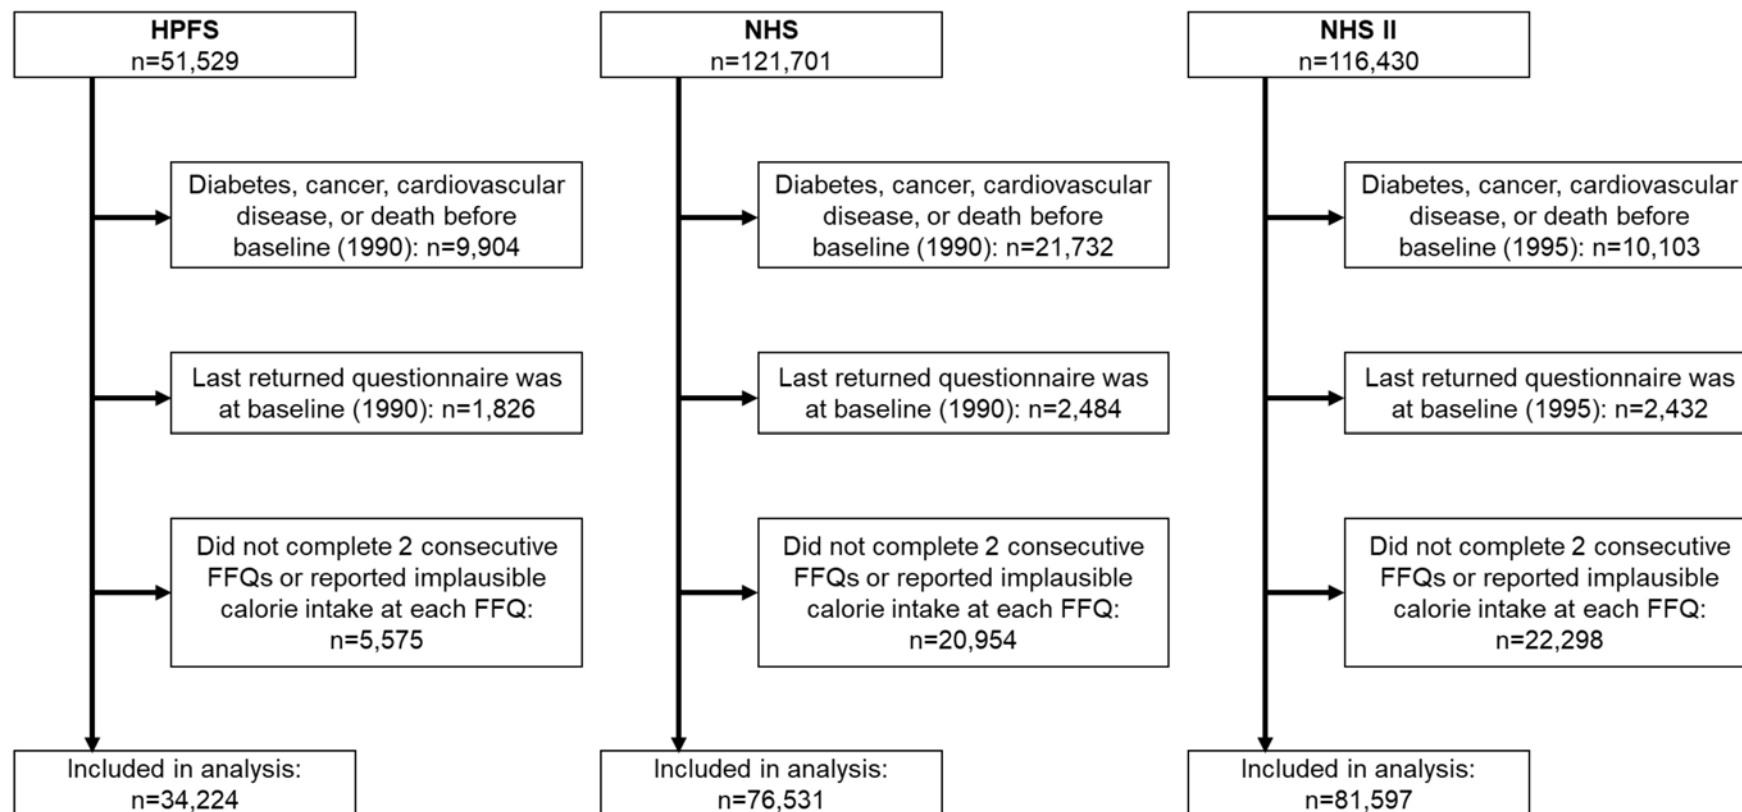

Supplement: DC190734SupplementaryData.pdf [file DC190734SupplementaryData.pdf]
